# Supplementary material for: Lack of phosphatidylinositol 3-kinase VPS34 in regulatory T cells leads to a fatal lymphoproliferative disorder without affecting their development
Source: PubMed Central journal article supplement (PMC11631860; doi:10.3389/fimmu.2024.1374621), 2024-11-27
Supplement: DataSheet1.pdf [file DataSheet1.pdf]

## Supplemental Figures

Fig. S1. Gene targeting and characterization of the VPS34<sup>Del21</sup> mice

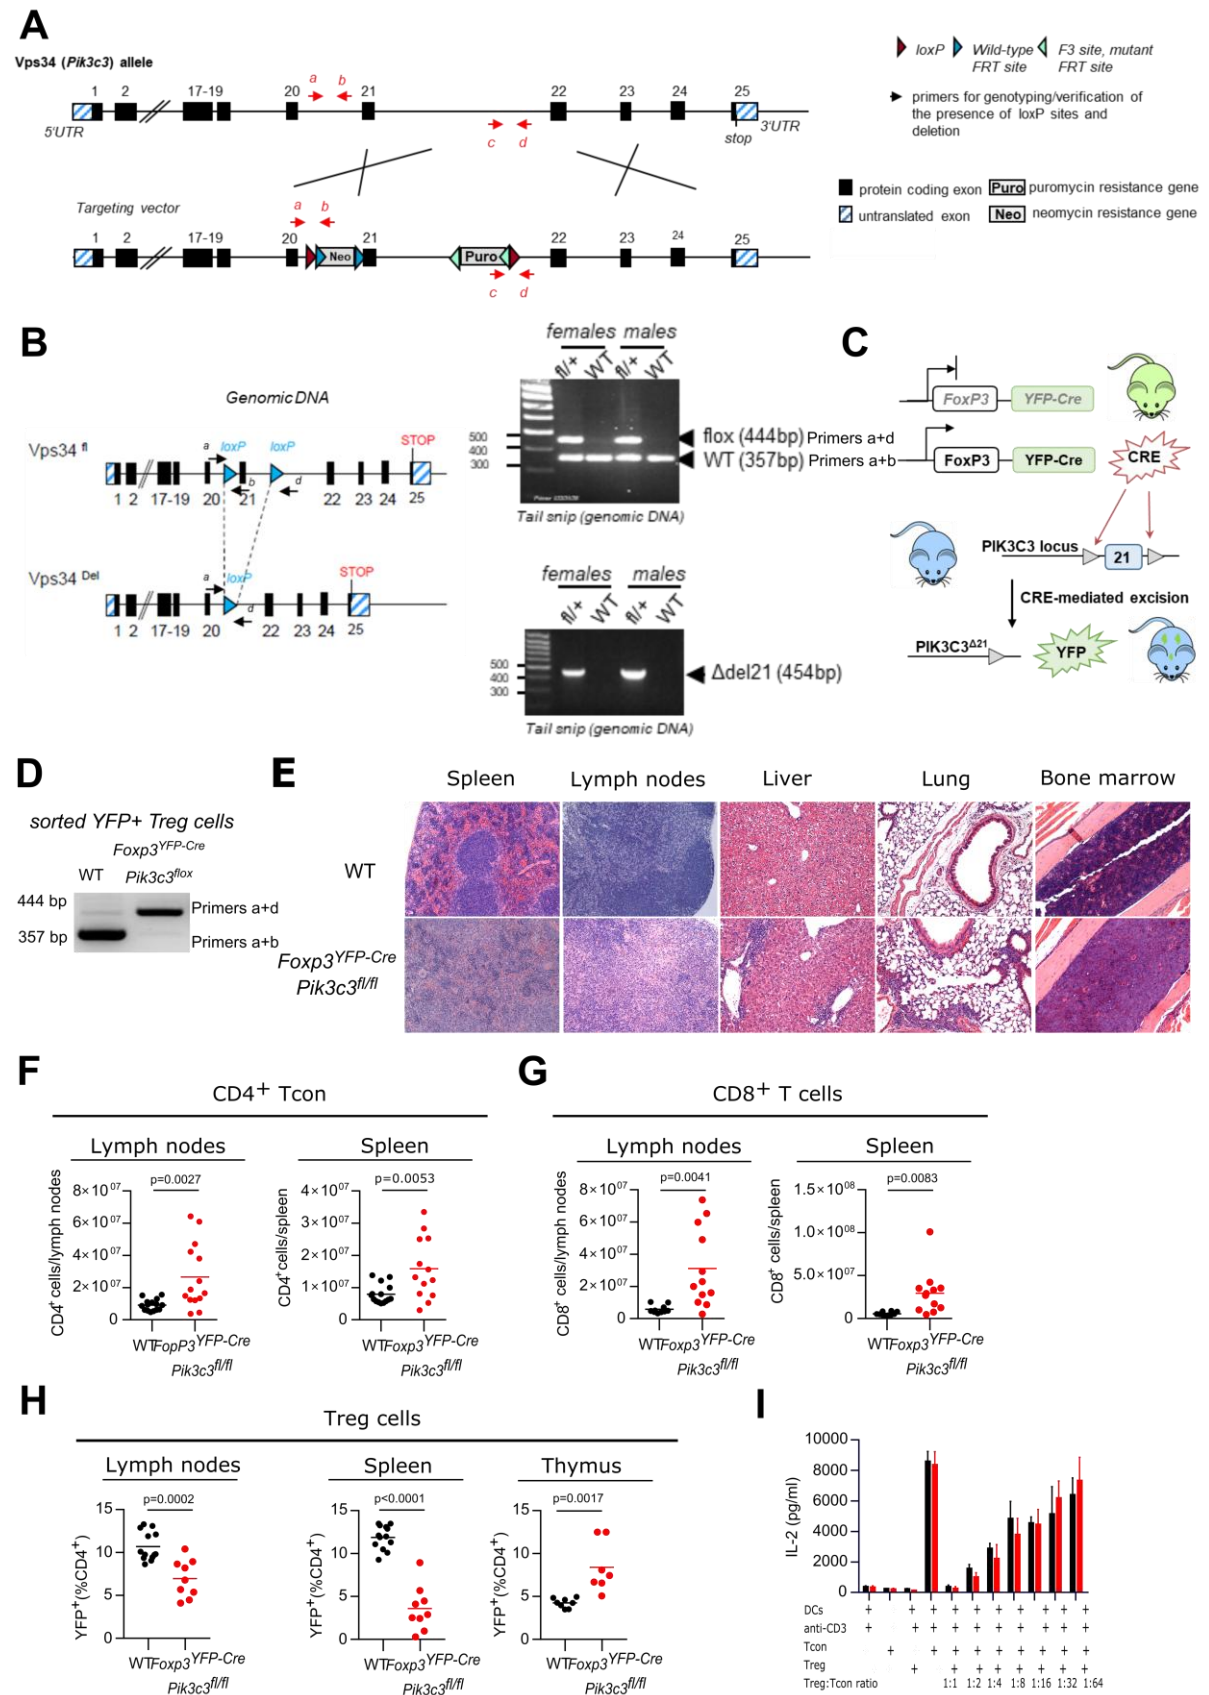

**A)** Gene targeting strategy to generate the conditional exon 21 deletion in the *Pik3c3* gene. The exon 21 encoding a critical stretch of the VPS34 kinase domain, was flanked by *loxP* sites, allowing an in-frame deletion upon exposure to Cre-recombinase. The FRT-flanked cassette encoding the *Pgk Neo* selection marker (Neo) was removed *in vivo* by breeding onto ACTB-Flp mice which express the FLP1 recombinase gene under the control of the *ACTB* (actin) promoter. **B)** *Pik3c3<sup>flox</sup>* mice were mated to Cre-deleter (B6.C-Tg(CMV-cre)1Cgn/J) transgenic mice which ubiquitously express Cre recombinase from the zygote stage of development (Schwenk et al., 1995). On the right, a representative image of agarose electrophoresis showing PCR products generated using the primer pair 1450\_33,1450\_34 (shown as “a”, “b”) for detection of heterozygous/homozygous WT and *loxP* alleles. For detection of deletion, the PCR primer pairs 1450\_33 and 1451-38 (shown as “a” and “d” respectively) were used. Each PCR were performed on genomic DNA isolated from tail snips. **C)** Targeting strategy to generate Treg cell-specific VPS34-kinase dead mice where exon 21 of *Pik3c3* (*Pik3c3<sup>flox</sup>*) (Bilanges et al., 2017) is deleted specifically in Treg cells by the Cre-recombinase expressed under the control of the *Foxp3* locus. **D)** DNA from wild-type (WT) and VPS34-deficient Treg cells that were purified by FACS-sorting from 4 to 5-week-old from *Foxp3<sup>YFP-Cre</sup> Pik3c3<sup>WT</sup>* or *Foxp3<sup>YFP-Cre</sup> Pik3c3<sup>flox</sup>* mice. A PCR product of 357 bp or 450 bp is detected for WT and VPS34-deficient Treg cells, respectively. **E)** Haematoxylin and eosin-stained sections from the spleen, inguinal lymph nodes, liver, lung, and femoral bone marrow of 32-day old *Foxp3<sup>YFP-Cre</sup> Pik3c3<sup>flox</sup>* and wild-type *Foxp3<sup>YFP-Cre</sup> Pik3c3<sup>WT</sup>* mice. 10x magnification. Absolute numbers of CD4<sup>+</sup> CD25<sup>-</sup> (**F**) and CD8<sup>+</sup> Tcon cells (**G**) in the lymph nodes (inguinal, brachial, and axillary) and spleen of *Foxp3<sup>YFP-Cre</sup> Pik3c3<sup>flox</sup>* and wild-type *Foxp3<sup>YFP-Cre</sup> Pik3c3<sup>WT</sup>* mice. **H)** Percentage of YFP<sup>+</sup> cells from CD4<sup>+</sup> cells in the lymph nodes (inguinal, brachial, and axillary), spleen, and thymus of *Foxp3<sup>YFP-Cre</sup> Pik3c3<sup>flox</sup>* and *Foxp3<sup>YFP-Cre</sup> Pik3c3<sup>WT</sup>* control mice. Mice were between 4 and 5.5 weeks old. n = 5–15 mice per group. Statistical significance was determined using a two-tailed Student’s t-test. Results are pooled from 3 independent experiments. **I)** Tcon and Treg cells from *Foxp3<sup>YFP-Cre</sup> Pik3c3<sup>flox</sup>* mice and control wild-type mice (WT) were co-cultured in the presence of dendritic cells and 1 µg/ml anti-CD3 for 96 h. IL-2 in the supernatant was measured by ELISA.

**Fig. S2. *Foxp3*<sup>YFP-Cre/WT</sup> *Pik3c3*<sup>fl/fl</sup> mosaic mice are phenotypically healthy**

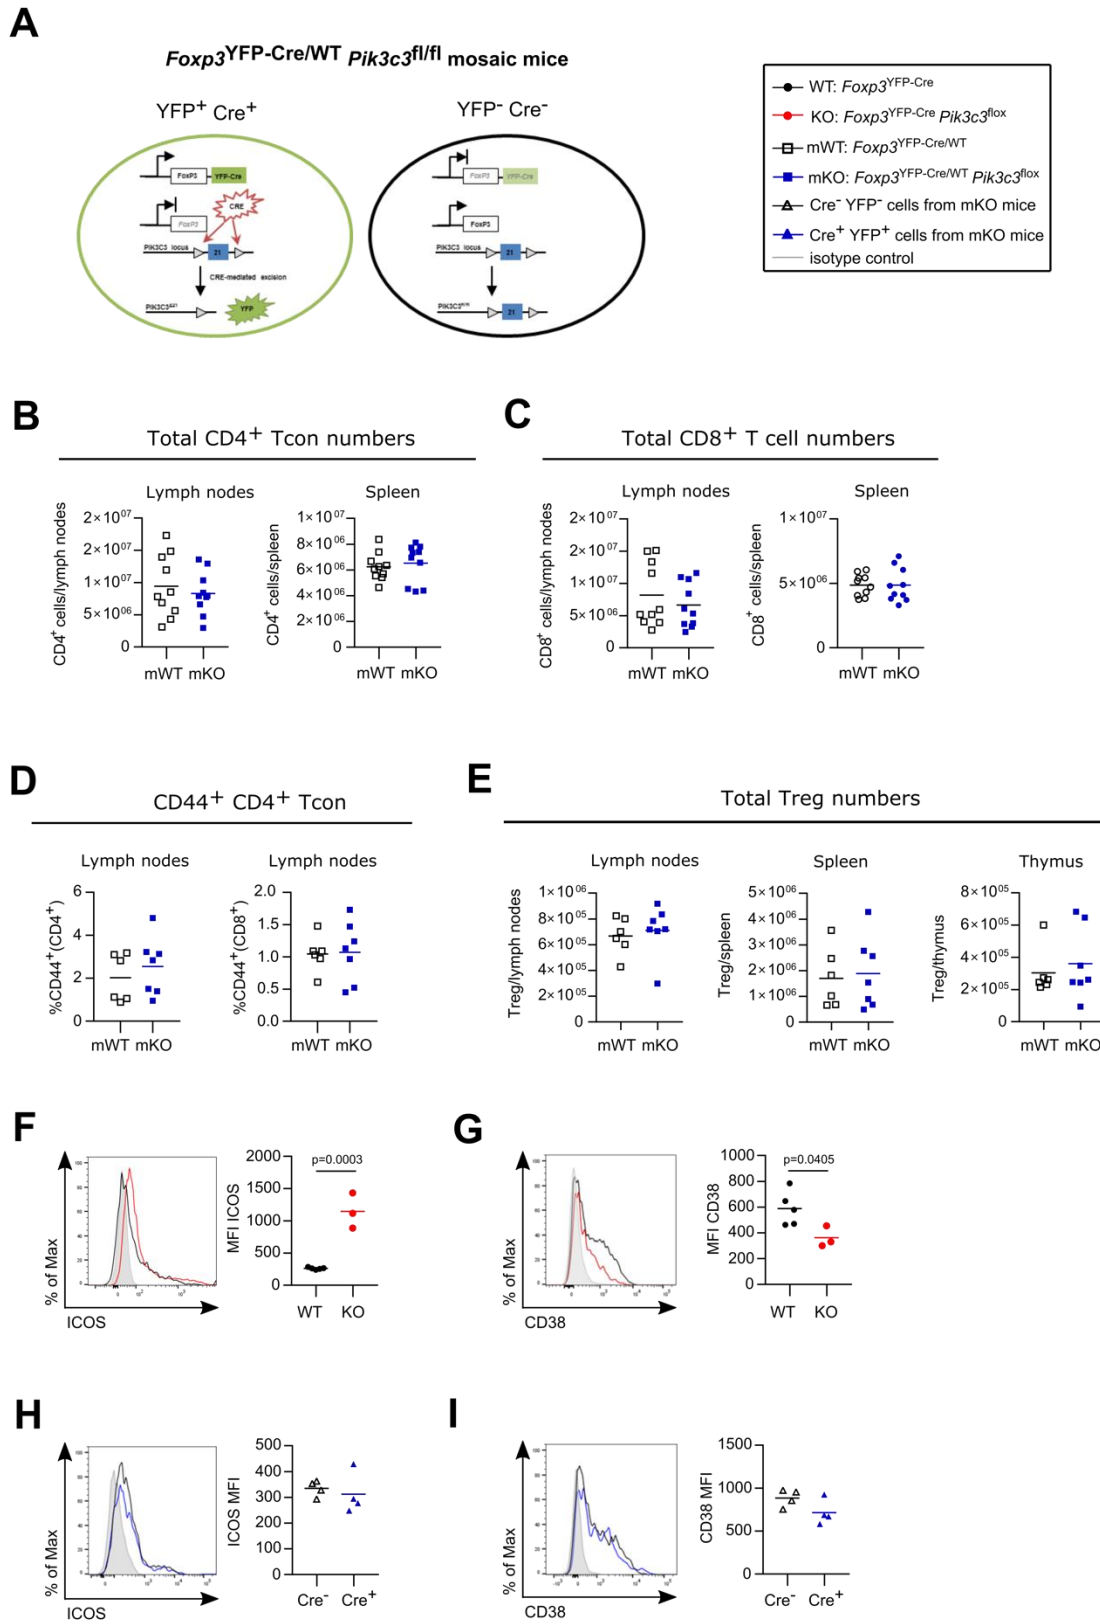

**A)** Mosaic knockout mice were generated by taking advantage of the localisation of the FoxP3 gene on the X chromosome. Random X chromosome inactivation leads to the depletion of VPS34 in approximately 50% of Treg cells in female mice heterozygous for the FoxP3<sup>YFP-Cre</sup> transgene (FoxP3<sup>YFP-Cre/WT</sup>). Accordingly, such mosaic female mice harbour two populations of Treg cells: a YFP<sup>-</sup> VPS34-sufficient and a YFP<sup>+</sup> VPS34-deficient Treg cell population. **B – C)** Absolute numbers of CD4<sup>+</sup> and CD8<sup>+</sup> T cells in spleen and lymph nodes (inguinal, brachial, and axillary) of Foxp3<sup>YFP-Cre/WT</sup>*Pik3c3*<sup>fllox</sup> mosaic (mKO) and wild-type *Foxp3*<sup>YFP-Cre/WT</sup>*Pik3c3*<sup>WT</sup> (mWT) mice. **D)** Percentage of CD44<sup>high</sup> CD62<sup>low</sup> Tcon in the spleen and the lymph nodes of *Foxp3*<sup>YFP-Cre/WT</sup>*Pik3c3*<sup>fllox</sup> mosaic (mKO) and wild-type *Foxp3*<sup>YFP-Cre/WT</sup>*Pik3c3*<sup>WT</sup> (mWT) mice. **E)** Absolute numbers of Treg cells in spleen, lymph nodes (inguinal, brachial, and axillary), and thymus of Foxp3<sup>YFP-Cre/WT</sup>*Pik3c3*<sup>fllox</sup> mosaic (mKO) and wild-type *Foxp3*<sup>YFP-Cre/WT</sup>*Pik3c3*<sup>WT</sup> (mWT) mice.

**F – G)** Mean fluorescence intensity (MFI) of ICOS (**F**) and CD38 (**G**) on splenic Treg cells of *Foxp3*<sup>YFP-Cre</sup>*Pik3c3*<sup>fllox</sup> mice (KO) and *Foxp3*<sup>YFP-Cre</sup> control mice (WT). **H – I)** Mean fluorescence intensity (MFI) of ICOS (**H**) and CD38 (**I**) on splenic VPS34-deficient (Cre<sup>+</sup>) and VPS34-sufficient (Cre<sup>-</sup>) Treg cells from *Foxp3*<sup>YFP-Cre/WT</sup>*Pik3c3*<sup>fllox</sup> mosaic mice. *Foxp3*<sup>YFP-Cre</sup>*Pik3c3*<sup>fllox</sup> mice and the respective control mice were between 4 and 5.5 weeks of age. *Foxp3*<sup>YFP-Cre/WT</sup>*Pik3c3*<sup>fllox</sup> mosaic mice and the respective control mice were between 8 and 12 weeks of age. n = 3-7 mice per group.

Statistical significance was determined using an unpaired two-tailed Student's t-test (**B – G**), or paired two-tailed Student's t-test (**H, I**). Results are pooled from 2 to 4 independent experiments.

**Fig S3**

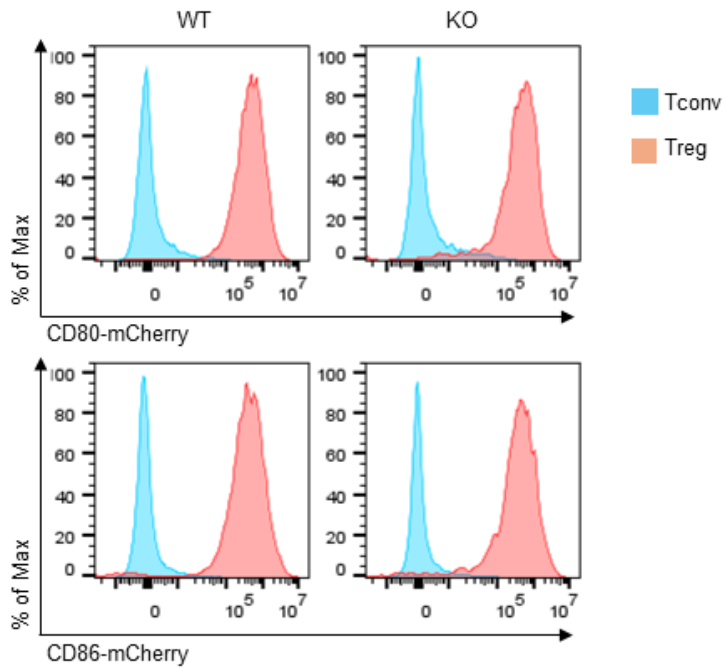

Treg cells were enriched from *Foxp3*<sup>YFP-Cre</sup>*Pik3c3*<sup>fllox</sup> and *Foxp3*<sup>YFP-Cre</sup>*Pik3c3*<sup>WT</sup> mice and co-cultured for 24 h with an equivalent number of JAWS-II cells expressing mCherry-tagged CD80 or CD86 on their surface. Representative histograms showing mCherry-tagged CD80 (top) of CD86 (bottom) acquired by Treg cells from *Foxp3*<sup>YFP-Cre</sup>*Pik3c3*<sup>WT</sup> (left) or *Foxp3*<sup>YFP-Cre</sup>*Pik3c3*<sup>fllox</sup> KO mice (right).
